# Supplementary material for: Testosterone Concentrations in Diabetic and Nondiabetic Obese Men
Source: PubMed Central journal article supplement — Diabetes Care. 2010 Mar 3;33(6):1186–92. doi: 10.2337/dc09-1649 (PMC2875421; doi:10.2337/dc09-1649), 2010-03-03
Supplement: supp_dc09-1649_onlineappendix.pdf [file supp_dc09-1649_onlineappendix.pdf]

**Online supplement Table 2:** Log transformed testosterone and SHBG concentrations of lean (BMI<25 kg/m<sup>2</sup>), overweight (BMI 25-29.9 kg/m<sup>2</sup>) and obese (BMI ≥30 kg/m<sup>2</sup>) non-DM men and DM men. Values in brackets are hormone concentrations after reverse log transformation in nmol/L.

Testosterone concentrations and prevalence of subnormal FT in DM and non-DM columns were adjusted to the mean age, BMI and SHBG concentration of the whole population. Testosterone concentrations and prevalence of subnormal FT in the lean, overweight and obese columns were adjusted only for age and SHBG.

\*p<0.05 vs obese men in the same group (DM or non-DM)

|                   | % of men with subnormal FT | log FT (nmol/L)             | Log Total T (nmol/L)      | Log BT (nmol/L)           | Log SHBG (nmol/l)        |
|-------------------|----------------------------|-----------------------------|---------------------------|---------------------------|--------------------------|
| All men           | 35%                        | 1.74±0.16<br>(0.189±0.005)  | 2.53±0.17<br>(11.9±0.05)  | 1.96±0.21<br>(3.14±0.06)  | 1.72±0.21<br>(52.1±1.6)  |
| non-DM            | 33%                        | 1.74±0.16<br>(0.192±0.005)  | 2.54±0.16<br>(12.1±0.005) | 1.97±0.20<br>(3.27±0.06)  | 1.72±0.21<br>(52.1±1.6)  |
| DM                | 45%                        | 1.71±0.18<br>(0.177±0.005)  | 2.51±0.18<br>(11.3±0.005) | 1.93±0.23<br>(2.94±0.06)  | 1.72±0.23<br>(52.1±1.7)  |
| p vs non-DM       | <0.001                     | <0.001                      | <0.001                    | <0.001                    | 0.98                     |
| lean non-DM       | 26%*                       | 1.77±0.17*<br>(0.203±0.005) | 2.56±0.16*<br>(12.7±0.05) | 1.98±0.22*<br>(3.35±0.06) | 1.80±0.21*<br>(63.2±1.6) |
| lean DM           | 44%                        | 1.73±0.20*<br>(0.186±0.006) | 2.54±0.18*<br>(12.0±0.05) | 1.92±0.23<br>(2.87±0.06)  | 1.83±0.17*<br>(68.2±1.5) |
| p vs non-DM       | 0.02                       | 0.15                        | 0.25                      | 0.03                      | 0.34                     |
| overweight non-DM | 29%*                       | 1.76±0.17*<br>(0.200±0.005) | 2.56±0.16*<br>(12.5±0.05) | 1.99±0.20*<br>(3.39±0.06) | 1.73±0.19*<br>(53.7±1.5) |
| overweight DM     | 44%                        | 1.72±0.19*<br>(0.182±0.005) | 2.52±0.17*<br>(11.4±0.05) | 1.94±0.25*<br>(3.02±0.06) | 1.70±0.22<br>(50.1±1.7)  |
| p vs non-DM       | <0.001                     | 0.014                       | 0.001                     | 0.002                     | 0.09                     |
| obese non-DM      | 40%                        | 1.72±0.16<br>(0.180±0.005)  | 2.52±0.16<br>(11.4±0.05)  | 1.93±0.20<br>(2.95±0.06)  | 1.67±0.20<br>(46.2±1.6)  |
| obese DM          | 50%                        | 1.68±0.16<br>(0.165±0.005)  | 2.49±0.17<br>(10.6±0.05)  | 1.90±0.21<br>(2.76±0.06)  | 1.67±0.22<br>(46.9±1.7)  |
| p vs non-DM       | 0.005                      | 0.012                       | 0.004                     | 0.04                      | 0.74                     |

**Online supplement Table 3:** Comparison of demographic parameters and hormone concentrations of men with subnormal or normal T concentrations. Please note that the mean SHBG concentration of men with subnormal FT is higher than that of normal FT. On the contrary, the mean SHBG concentration of men with normal total T is higher than that of men with subnormal total T.

\*p<0.05 vs men with normal T concentrations

|                                 | Men with subnormal FT | Men with normal FT | Men with subnormal total T | Men with normal total T | Men with subnormal FT and total T | Men with normal FT and total T |
|---------------------------------|-----------------------|--------------------|----------------------------|-------------------------|-----------------------------------|--------------------------------|
| n                               | 653                   | 1196               | 646                        | 1203                    | 401                               | 951                            |
| Age(years)                      | 65.7 ± 10.8*          | 58.3 ± 8.9         | 61.7±10.5*                 | 60.5±10.1               | 64.2±10.6*                        | 58.4±8.9                       |
| BMI (kg/m <sup>2</sup> )        | 30.3 ± 6.1*           | 29.3 ± 5.3         | 31.7±6*                    | 28.6±5                  | 31.6±6.4*                         | 28.7±5.1                       |
| Total T ng/dl                   | 290.1 ± 111.8*        | 411.3 ±143.7       | 234.4± 50.2*               | 440.4± 127.6            | 219.2±53.8*                       | 450.5±130.1                    |
| Total T nmol/l                  | 12.7± 4.9*            | 18±6.3             | 10.3±2.2*                  | 19.3±5.6                | 9.6±2.4*                          | 19.8±5.7                       |
| SHBG nmol/l                     | 64.2 ±33.7*           | 55.2 ± 27.1        | 41.7± 19.1*                | 67.2± 30.9              | 48.0±20.7*                        | 61.2±26.9                      |
| FT pg/ml                        | 38.5 ± 8.8*           | 68.8 ± 18.0        | 45.6± 14.9*                | 64.8± 21                | 36.5±9.5*                         | 70.9±19.1                      |
| FT nmol/l                       | 0.169±0.039*          | 0.302±0.079        | 0.2±0.065*                 | 0.284±0.092             | 0.16±0.041*                       | 0.311±0.084                    |
| BT ng/dl                        | 64.8 ± 24.9*          | 120.7 ± 47.9       | 81.5± 35*                  | 111.4± 52.3             | 63.8±26.6*                        | 123.3±51.5                     |
| BT nmol/l                       | 2.84±1.09*            | 5.29±2.1           | 3.57±1.54*                 | 4.89±2.29               | 2.8±0.92*                         | 5.41±2.26                      |
| Prevalence of subnormal FT      |                       |                    | 62%*                       | 21%                     |                                   |                                |
| Prevalence of subnormal total T | 61%*                  | 39%                |                            |                         |                                   |                                |
